# Supplementary material
Source: publisher figshare collection journal article supplement (https://asha.figshare.com/ndownloader/files/17476025)
Supplement: Supplementary file 1 [file 17476025]

**Supplemental Material S1. Discourse Inventory and Monitoring Resource.**

| <b>Communication Activity</b>                         | <b>Communication Partner</b> | <b>M</b> | <b>T</b> | <b>W</b> | <b>T</b> | <b>F</b> | <b>S</b> | <b>S</b> |
|-------------------------------------------------------|------------------------------|----------|----------|----------|----------|----------|----------|----------|
| Conversation                                          |                              |          |          |          |          |          |          |          |
| General Chat                                          |                              |          |          |          |          |          |          |          |
| Told a story                                          |                              |          |          |          |          |          |          |          |
| Gave my opinion                                       |                              |          |          |          |          |          |          |          |
| Explained a problem and discussed potential solutions |                              |          |          |          |          |          |          |          |
| Explained how to do something                         |                              |          |          |          |          |          |          |          |
| Gave information or advice                            |                              |          |          |          |          |          |          |          |
| Interview or Appointment/Meeting                      |                              |          |          |          |          |          |          |          |
| Phone Call                                            |                              |          |          |          |          |          |          |          |
| Text Message                                          |                              |          |          |          |          |          |          |          |
| Email                                                 |                              |          |          |          |          |          |          |          |
| Shopping Exchange                                     |                              |          |          |          |          |          |          |          |
| Ordered food or a meal                                |                              |          |          |          |          |          |          |          |
| Negotiated an appointment                             |                              |          |          |          |          |          |          |          |
| Reported on an event                                  |                              |          |          |          |          |          |          |          |

\* Put an asterisk next to any communication activities that were challenging or that you would like to improve on. The Communication Partner List may be helpful to examine in relation to strengthening your social networks or thinking about the nature of your relationship with that person, i.e., very close, close, unfamiliar.
